# Supplementary material
Source: Springer Nature journal article supplement (https://www.springermedizin.de/resource/supplementary/12963_2011_162_MOESM1_ESM.pdf/9572792)

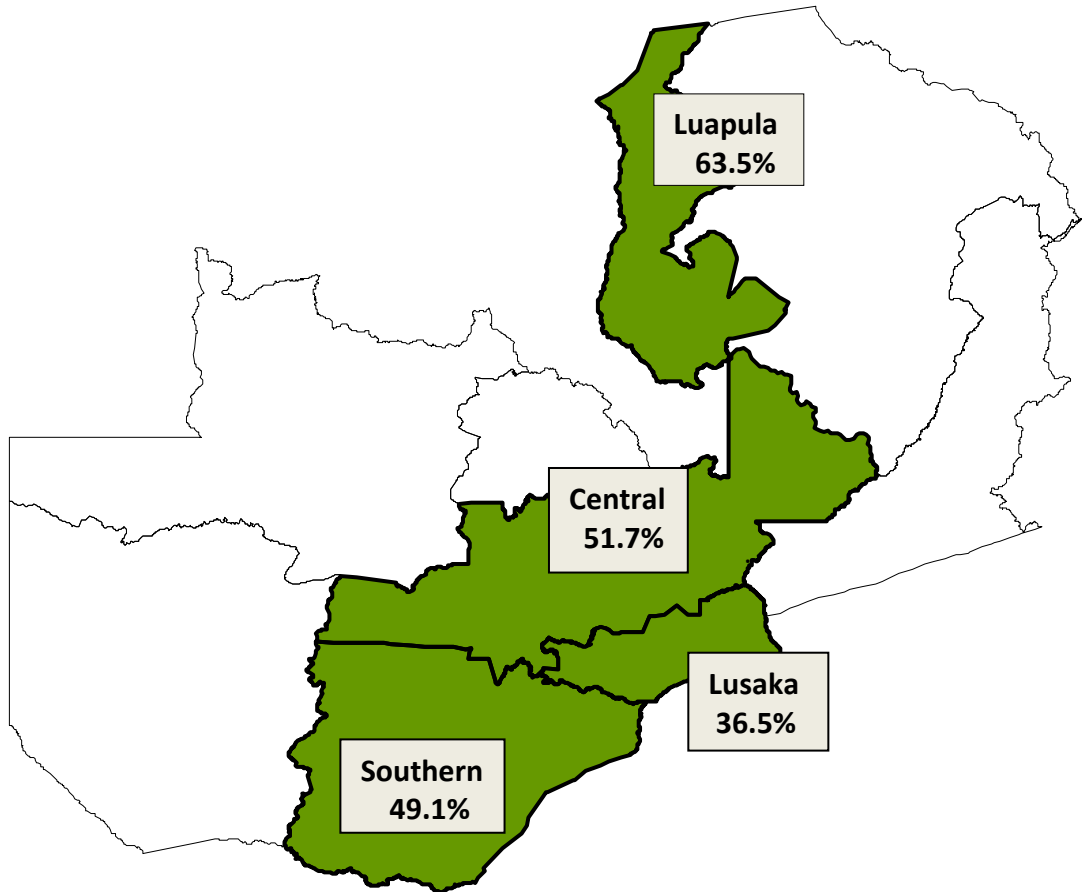

**Luapula**  
63.5%

**Central**  
51.7%

**Southern**  
49.1%

**Lusaka**  
36.5%

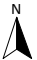

Supplement: MOESM1 [file 9572792]
